# Supplementary material for: A concise approach to the synthesis of the uniqueN-mannosyld-β-hydroxyenduracididine moiety in the mannopeptimycin series of natural products
Source: Royal Society of Chemistry journal article supplement (doi:10.1039/c6ob00644b), 2016-01-01
Supplement: c6ob00644b1.pdf [file c6ob00644b1.pdf]

## Supporting Information

### **A Concise Approach Towards the Synthesis of the Unique *N*-Mannosyl D- $\beta$ -Hydroxyenduracididine Moiety in the Mannopeptimycin Series of Natural Products**

Cheng-Kun Lin,<sup>a</sup> Wen-Yi Yun,<sup>a</sup> Lin-Ting Lin,<sup>b</sup> and Wei-Chieh Cheng\*<sup>a</sup>

<sup>a</sup> *Genomics Research Center, Academia Sinica, 128, Section 2, Academia Road, Taipei, 11529*

<sup>b</sup> *Department of Chemistry, National Cheng Kung University, 1, University Road, Tainan City,  
701, Taiwan*

Copies of  $^1\text{H}$  and  $^{13}\text{C}$  NMR spectra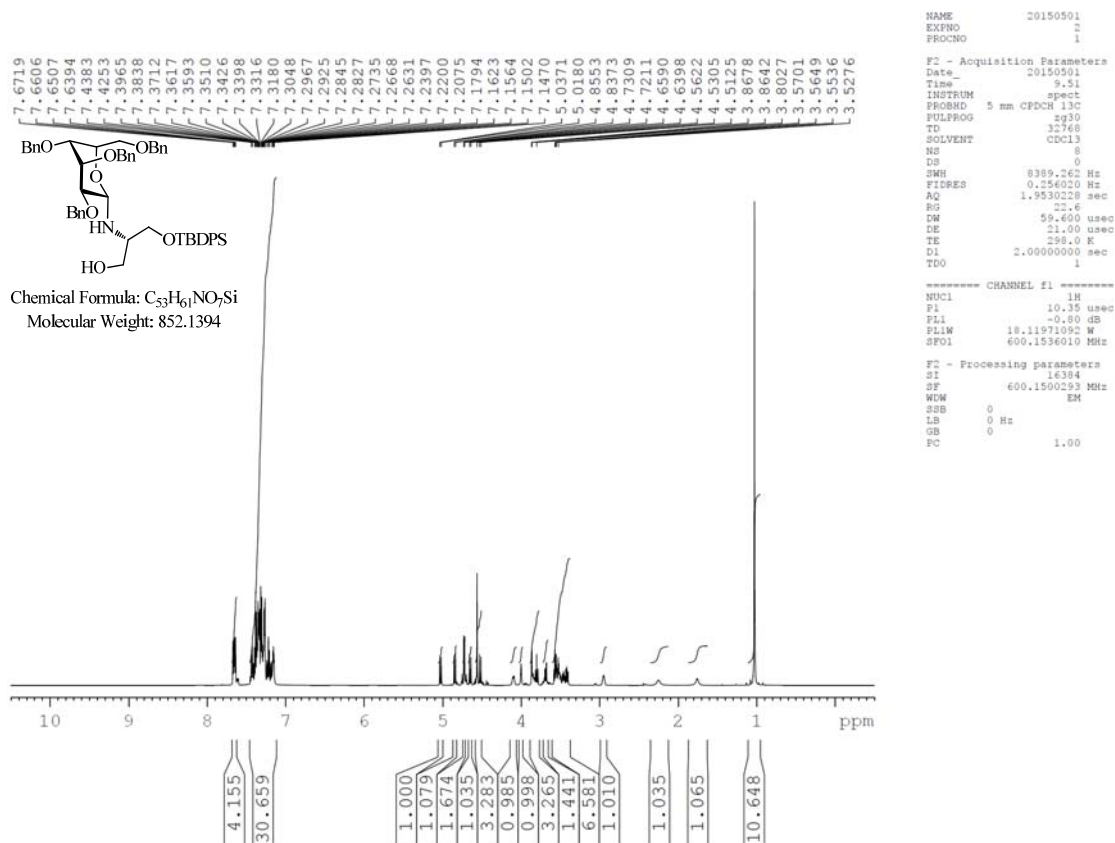 $^1\text{H}$  NMR spectrum of compound **12** (600 MHz,  $\text{CDCl}_3$ )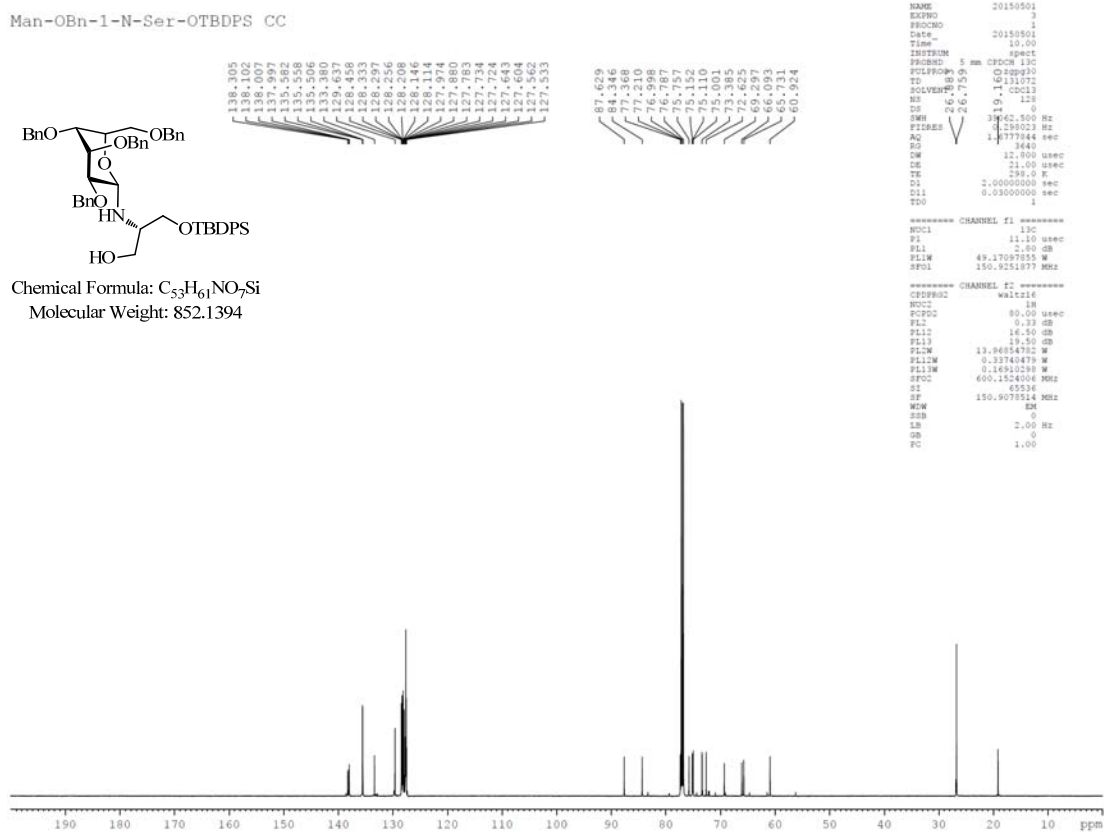 $^{13}\text{C}$  NMR spectrum of compound **12** (150 MHz,  $\text{CDCl}_3$ )

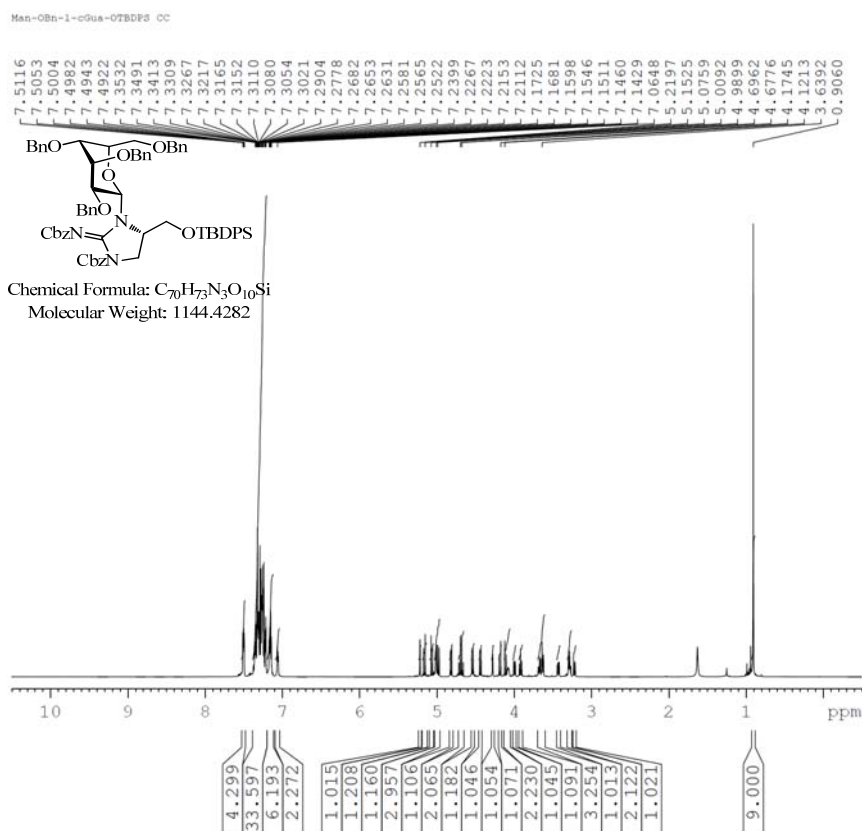 $^1\text{H}$  NMR spectrum of compound **9** (600 MHz,  $\text{CDCl}_3$ )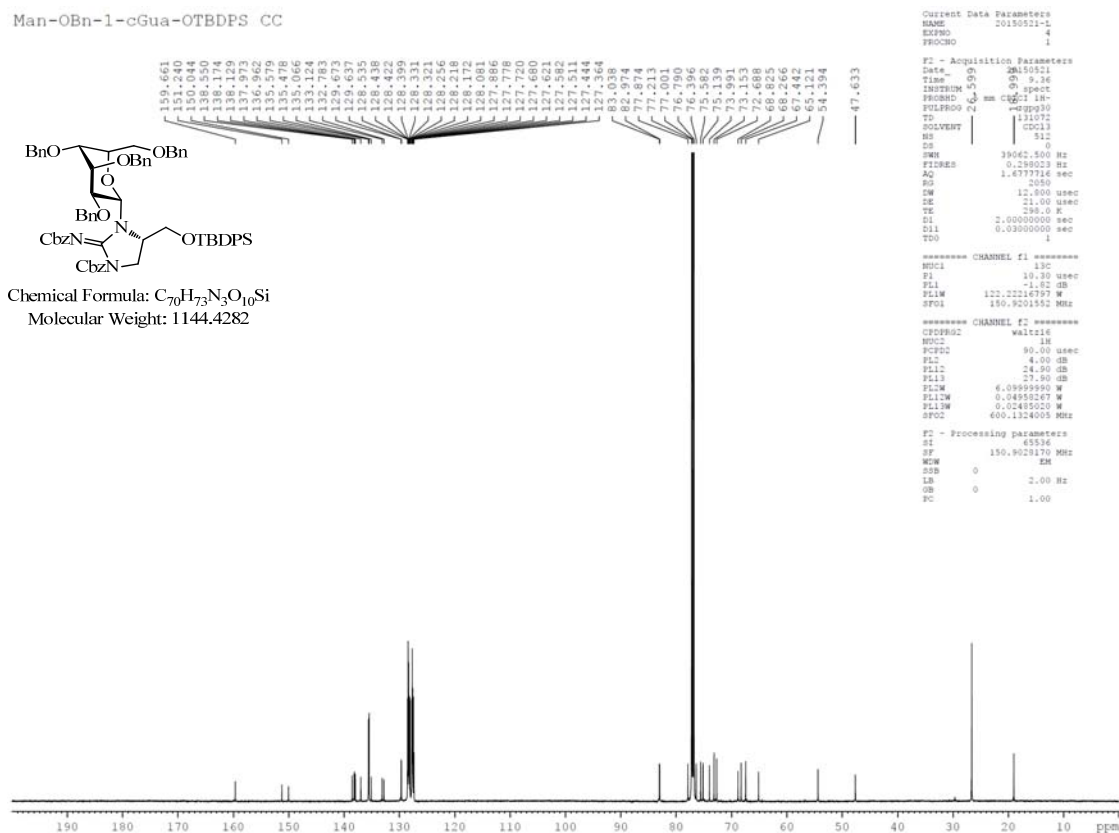 $^{13}\text{C}$  NMR spectrum of compound **9** (150 MHz,  $\text{CDCl}_3$ )



Man-OBn-1-cGua-Z-CH=CHCO<sub>2</sub>Me KHMS PTC (2 eq.) CC f06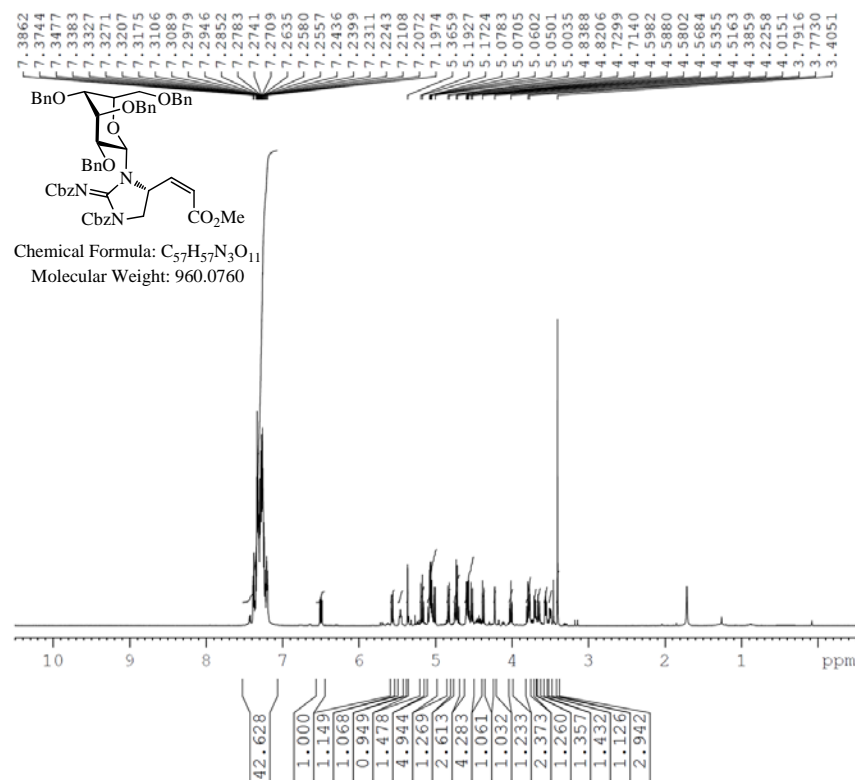

Current Data Parameters  
NAME 20150706  
EXPRO 1  
PROCNO 1

F2 - Acquisition Parameters  
Date 20150706  
Time 14.44  
INSTRUM spect  
PROBHD 5 mm CPDCH 13C  
PULPROG zg30  
TD 32768  
SOLVENT CDCl<sub>3</sub>  
NS 8  
DS 0  
SWH 8389.262 Hz  
FIDRES 0.256020 Hz  
AQ 1.9530225 sec  
RG 20.2  
DW 59.600 usec  
DE 21.00 usec  
TE 298.0 K  
D1 2.0000000 sec  
TDO 1

===== CHANNEL f1 =====  
NUC1 1H  
P1 10.35 usec  
PL1 -0.00 dB  
PL1W 10.11971092 W  
SFO1 600.1536010 MHz

F2 - Processing parameters  
SI 4384  
SF 600.1500278 MHz  
WDW EM  
SFB 0  
LFB 0 Hz  
GB 0  
PC 1.00

<sup>1</sup>H NMR spectrum of compound (Z)-10 (600 MHz, CDCl<sub>3</sub>)Man-OBn-1-cGua-Z-CH=CHCO<sub>2</sub>Me KHMS PTC (2 eq.) CC f06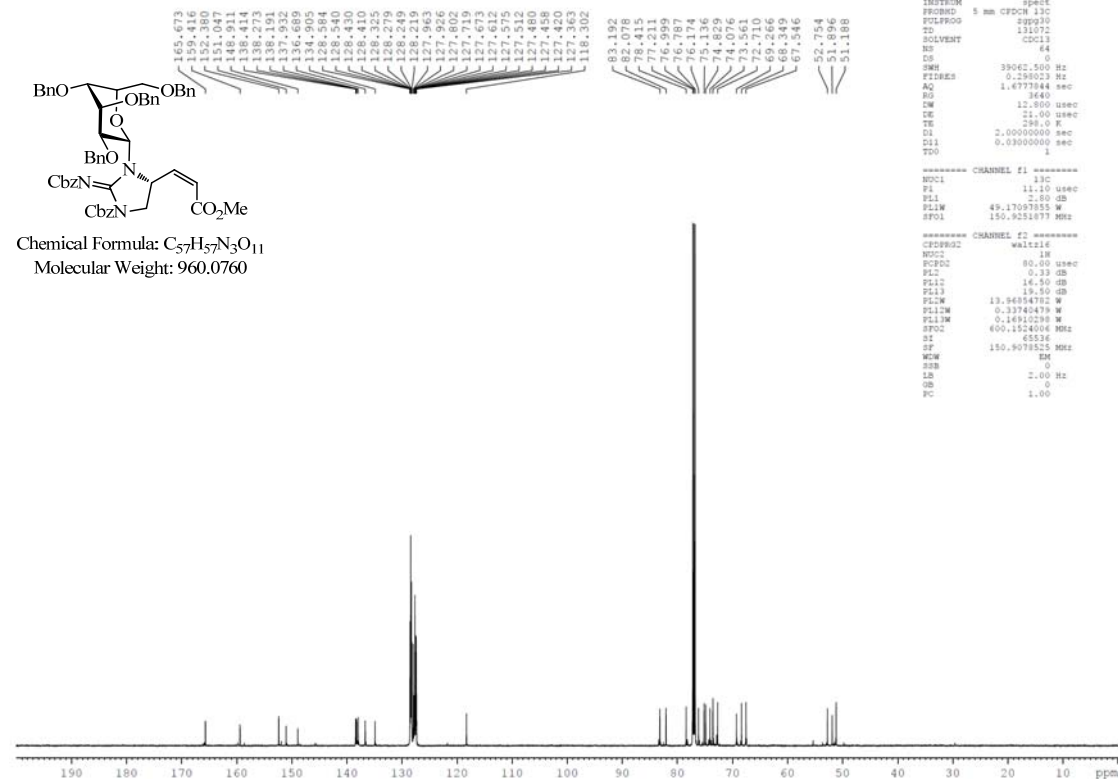<sup>13</sup>C NMR spectrum of compound (Z)-10 (150 MHz, CDCl<sub>3</sub>)

Man-OBn-1-cGua-Z-CH(OH)CH(OH)CO<sub>2</sub>Me CC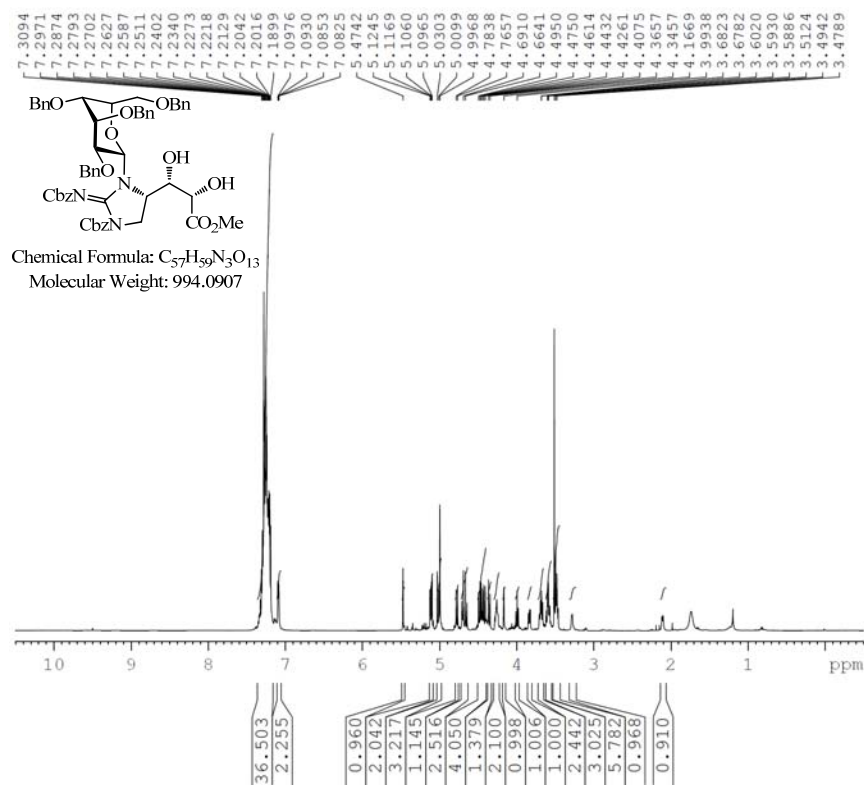<sup>1</sup>H NMR spectrum of compound 14 (600 MHz, CDCl<sub>3</sub>)Man-OBn-1-cGua-Z-CH(OH)CH(OH)CO<sub>2</sub>Me CC f10-11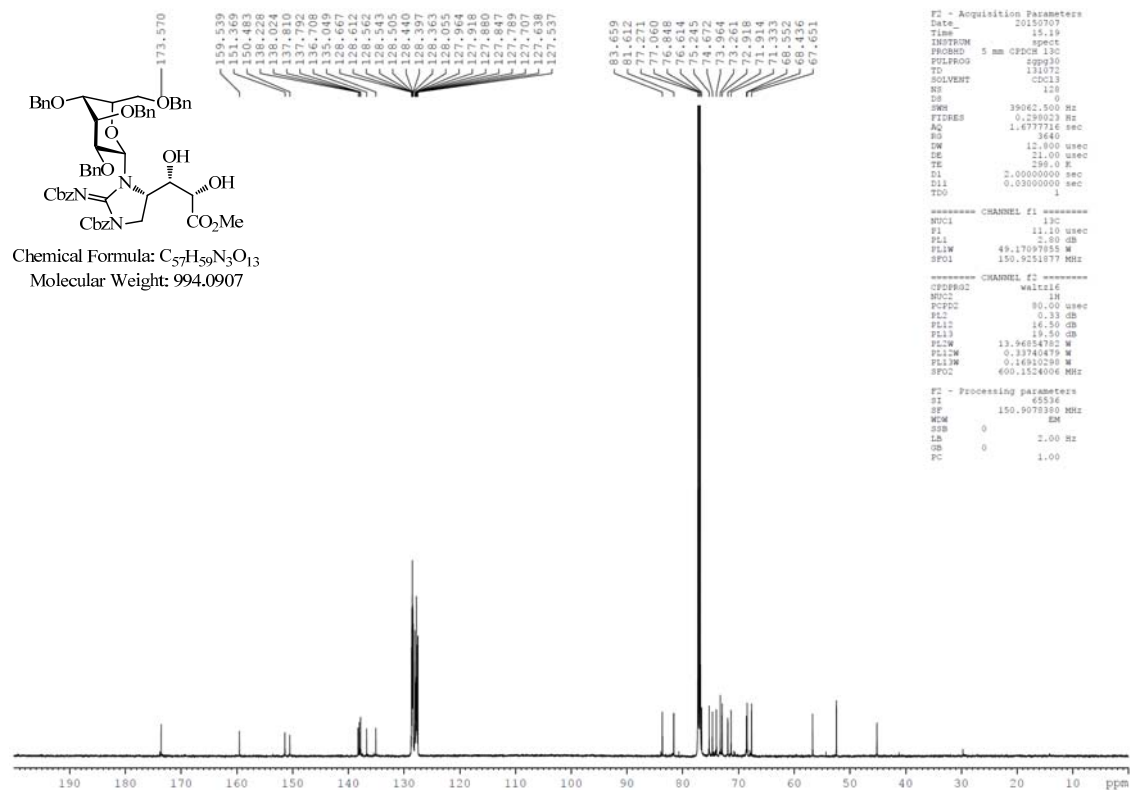<sup>13</sup>C NMR spectrum of compound 14 (150 MHz, CDCl<sub>3</sub>)

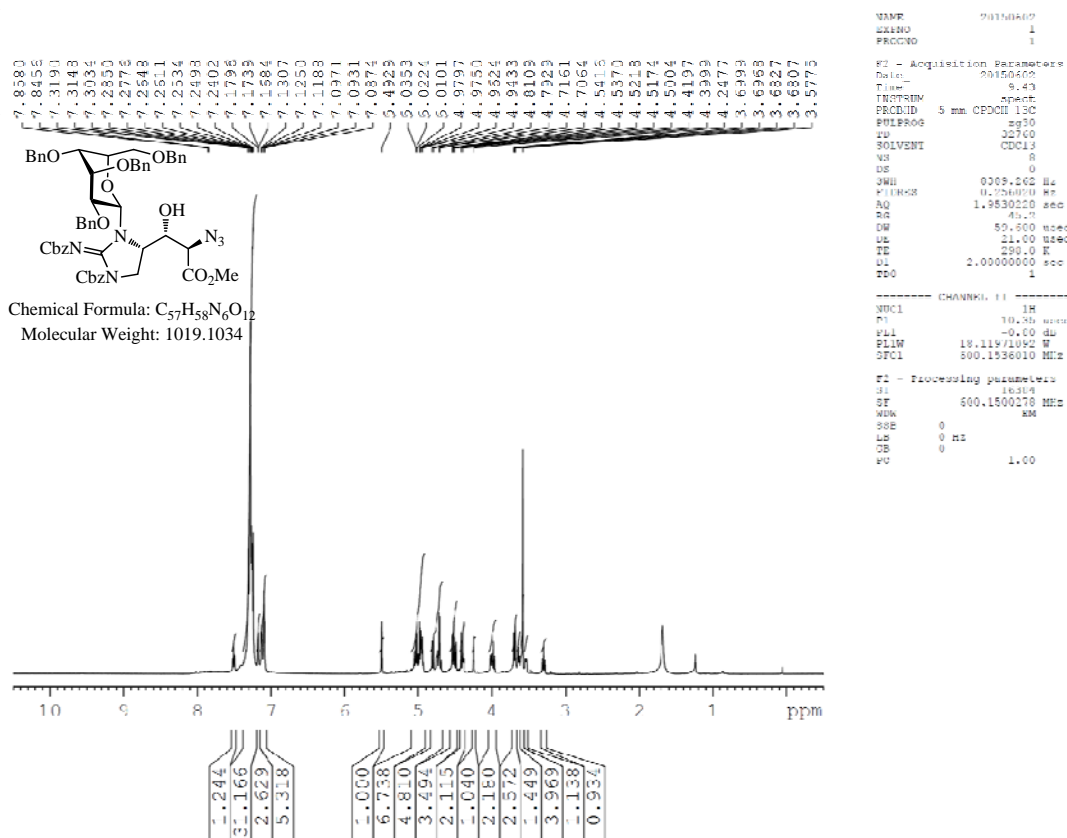**<sup>1</sup>H NMR spectrum of compound 11 (600 MHz, CDCl<sub>3</sub>)**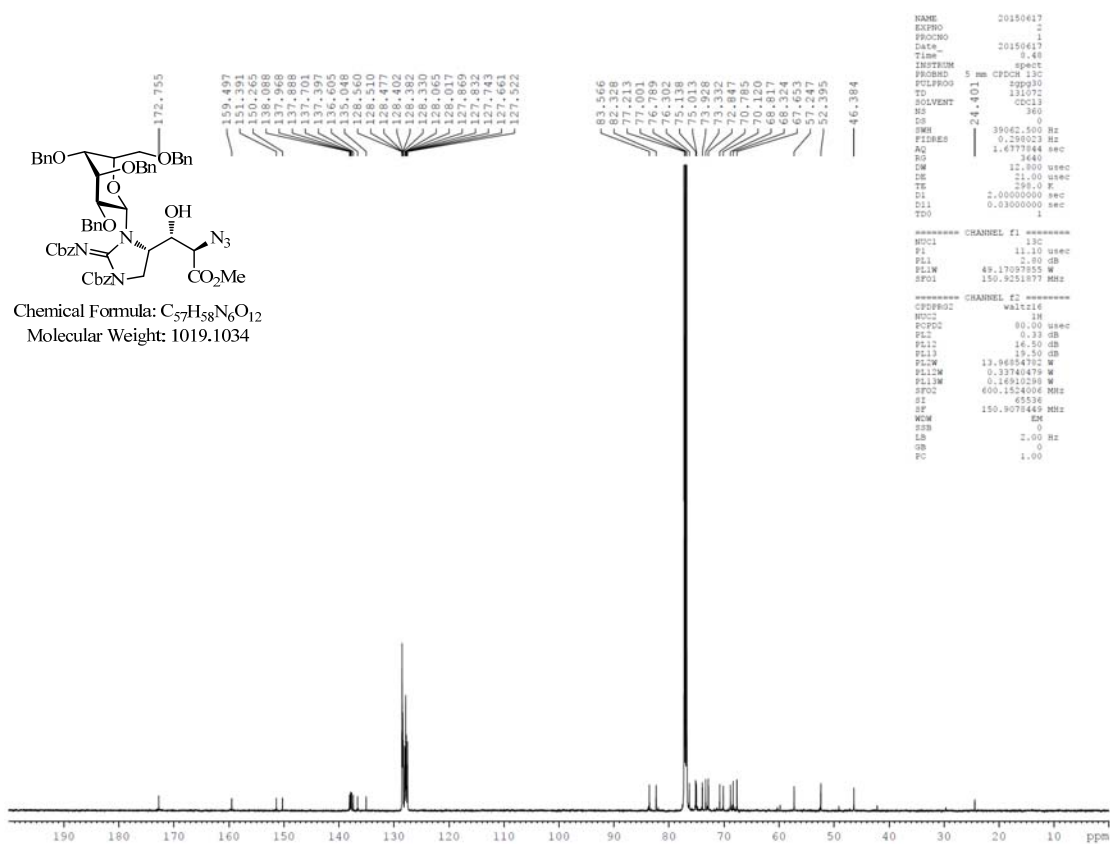**<sup>13</sup>C NMR spectrum of compound 11 (150 MHz, CDCl<sub>3</sub>)**
